# Supplementary material for: Burden of pneumocystis pneumonia in HIV-infected adults in sub-Saharan Africa: a systematic review and meta-analysis
Source: Springer Nature journal article supplement (doi:10.1186/s12879-016-1809-3), 2016-09-09
Supplement: MOESM1 [file 10687816]

**Table S1: SEARCH STRATEGY**

| SEARCH | MeSH term (modified as needed for use in other databases)                                                                                                                                                                                                                                                                                                                                                                                                                                                                                                             |
|--------|-----------------------------------------------------------------------------------------------------------------------------------------------------------------------------------------------------------------------------------------------------------------------------------------------------------------------------------------------------------------------------------------------------------------------------------------------------------------------------------------------------------------------------------------------------------------------|
| #1     | pneumocystis                                                                                                                                                                                                                                                                                                                                                                                                                                                                                                                                                          |
| #2     | pneumonia, pneumocystis                                                                                                                                                                                                                                                                                                                                                                                                                                                                                                                                               |
| #3     | pneumocystis jirovecii                                                                                                                                                                                                                                                                                                                                                                                                                                                                                                                                                |
| #4     | pneumocystis carinii                                                                                                                                                                                                                                                                                                                                                                                                                                                                                                                                                  |
| #5     | #1 OR #2 OR #3 OR #4                                                                                                                                                                                                                                                                                                                                                                                                                                                                                                                                                  |
| #6     | pneumonia                                                                                                                                                                                                                                                                                                                                                                                                                                                                                                                                                             |
| #7     | community-acquired pneumonia                                                                                                                                                                                                                                                                                                                                                                                                                                                                                                                                          |
| #8     | bronchopneumonia                                                                                                                                                                                                                                                                                                                                                                                                                                                                                                                                                      |
| #9     | #6 OR #7 OR #8                                                                                                                                                                                                                                                                                                                                                                                                                                                                                                                                                        |
| #10    | #5 OR #9                                                                                                                                                                                                                                                                                                                                                                                                                                                                                                                                                              |
| #11    | hiv                                                                                                                                                                                                                                                                                                                                                                                                                                                                                                                                                                   |
| #12    | hiv infections                                                                                                                                                                                                                                                                                                                                                                                                                                                                                                                                                        |
| #13    | hiv-1                                                                                                                                                                                                                                                                                                                                                                                                                                                                                                                                                                 |
| #14    | hiv seropositivity                                                                                                                                                                                                                                                                                                                                                                                                                                                                                                                                                    |
| #15    | aids-related opportunistic infections                                                                                                                                                                                                                                                                                                                                                                                                                                                                                                                                 |
| #16    | #11 OR #12 OR #13 OR #14 OR #15                                                                                                                                                                                                                                                                                                                                                                                                                                                                                                                                       |
| #17    | acquired immunodeficiency syndrome                                                                                                                                                                                                                                                                                                                                                                                                                                                                                                                                    |
| #18    | aids serodiagnosis                                                                                                                                                                                                                                                                                                                                                                                                                                                                                                                                                    |
| #19    | #17 OR #18                                                                                                                                                                                                                                                                                                                                                                                                                                                                                                                                                            |
| #20    | #16 OR #19                                                                                                                                                                                                                                                                                                                                                                                                                                                                                                                                                            |
| #21    | africa                                                                                                                                                                                                                                                                                                                                                                                                                                                                                                                                                                |
| #22    | africa south of the sahara                                                                                                                                                                                                                                                                                                                                                                                                                                                                                                                                            |
| #23    | africa, western                                                                                                                                                                                                                                                                                                                                                                                                                                                                                                                                                       |
| #24    | africa, southern                                                                                                                                                                                                                                                                                                                                                                                                                                                                                                                                                      |
| #25    | africa, eastern                                                                                                                                                                                                                                                                                                                                                                                                                                                                                                                                                       |
| #26    | africa, central                                                                                                                                                                                                                                                                                                                                                                                                                                                                                                                                                       |
| #27    | #21 OR #22 OR #23 OR #24 OR #25 OR #26                                                                                                                                                                                                                                                                                                                                                                                                                                                                                                                                |
| #28    | angola OR benin OR botswana OR burkina faso OR burundi OR central african republic OR chad OR congo OR cote d ivoire OR democratic republic of the congo OR djibouti OR ethiopia OR eritrea OR equatorial guinea OR gabon OR gambia OR ghana OR guinea OR guinea-bissau OR kenya OR lesotho OR liberia OR malawi OR mali OR Mauritania OR mozambique OR namibia OR niger OR nigeria OR rwanda OR senegal OR sierra leone OR somalia OR south africa OR sudan OR swaziland OR tanzania OR togo OR uganda OR united republic of cameroon OR zaire OR zambia OR zimbabwe |
| #29    | #27 OR #28                                                                                                                                                                                                                                                                                                                                                                                                                                                                                                                                                            |
| #30    | #10 AND #20 AND #29                                                                                                                                                                                                                                                                                                                                                                                                                                                                                                                                                   |
